# Supplementary material for: Bi-Mirror Tunable Reflective Axicon-like Device for Broadband THz Applications
Source: Preprints.org preprint supplement (doi:10.20944/preprints202309.1572.v1), 2023-09-25
Supplement: Supplementary file 1 [file supplementary]

**Supplementary material**

In this section we design a procedure based on the use of visible radiation (wavelength ** = 0. 633 m), to simulate the longitudinal focusing performances of the axicon at 1THz frequency (wavelength ** =300 m). Referring to the scheme of Fig. A1 , the axicon produced with a heating power of 270 mW (swelling : 164m) , focuses virtually the radiation at 1 THz frequency with a maximum intensity *Imax* at a distance *zmax*= 3.4 mm from the surface, with a focus *FWHMx* = 0.92 mm.

Let’s consider a segment of length **z centered at *zmax*, at the ends of which the relative intensity reduction is*I/Imax* . As explained in the Theoretical modeling section, by properly reducing the heating power we can generate an axicon that yields at a wavelength*2* the same spatial field distribution produced at the wavelength** Indeed, the field at coordinates *zmax±z* is reproduced at unchanged transversal coordinates, but at expanded z-coordinates, namely *M (zmax±z) = M·zmax± *where*M·z =142.8* mm and  *M=*** The maximum intensity is transferred at the point PF whose *z*-coordinate is *zF = zmaxM*and here the *FWHMx* remains unchanged while its distance from L is *pF = dL+ zF* = 2218 mm and the overall *Dax* is enlarged to 7520 mm. This expanded virtual focal region at ** is imaged and demagnified in the real space by the positive lens L (Fig.A1).


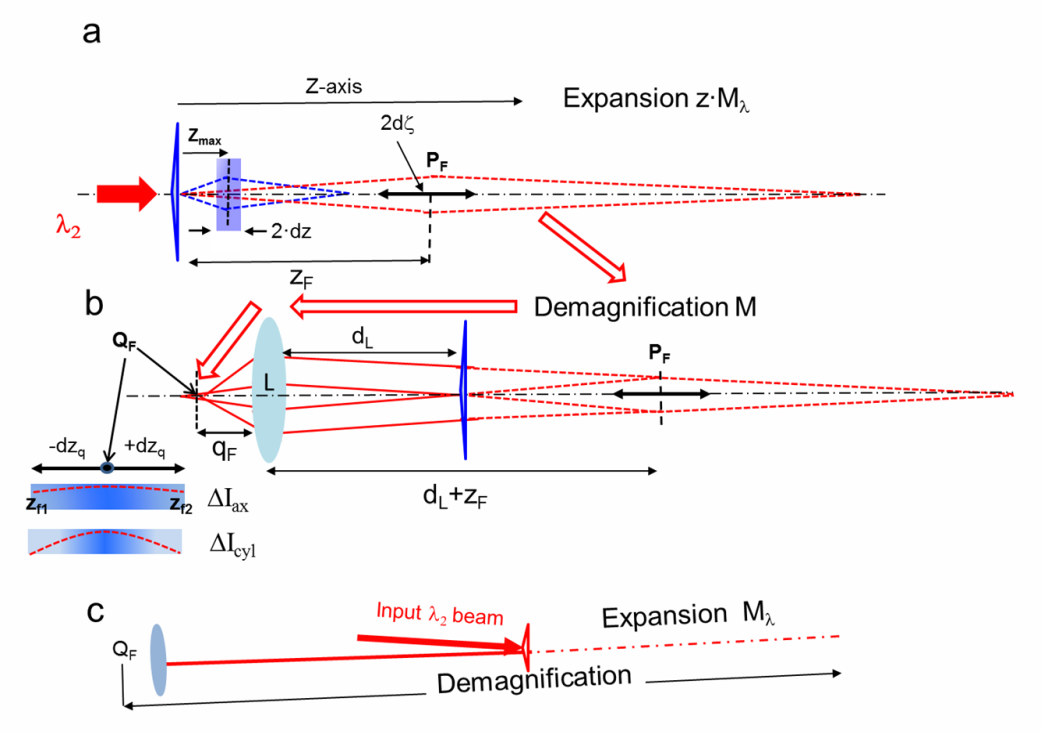


**Fig.A1.** (a) Schematic representation of the simulation at the wavelength m of the focus region produced by the axicon at 1 THz frequency (flattened blue triangle). The length *dz* (= 0.30 mm) is an arbitrarily small width of the longitudinal region around the point of maximum intensity, placed at *zmax*= 3.4 mm (**blue dashed quadrilateral**). The virtual expanded simulation region is represented by the **red dashed quadrilateral** . (b) Transfer and demagnification in the real space by the lens L (focal length =100 mm) of the expanded virtual focal region. The variation Iax at the endpoints of the focal region is compared with that one, Icyl, calculated when the axicon is changed with a cylindrical mirror with the same focal length.

(c) In order to simplify the optical set-up, in the experimental layout the two sections (a) and (b) are collinear and tilted by a small angle with respect to the input light probe at wavelength **. For the detailed description see the text of Appendix.

However , aiming to consider the imaging of the whole focus region, one should take into account that the demagnification suffers a strong change along the axis, and as a consequence the light intensity distribution downline of L would have strong distortions with respect that one in the axicon focus of 1 THz radiation. In order to avoid this complication and simplify the calculations, we will select *<< pF* by choosing an arbitrarily low value of *z =*0.3 mm *<< zmax* in our case. By applying the law of conjugate points, PF is imaged in the point QF at a distance *qF= pF/M*=104.72 mm from L, with a transversal de-magnification *M* =22.2 . As it can be easily verified, *M* is uniform within ±3.5 % with respect to its average value (*Mav* =21.8) in the segment centered onPF, whose length is *2d*As*z/pF*= 0.064<<1, the length *zq,* longitudinal image of *d,* can be simply found by applying the approximate relationship of geometrical optics *zq~ /M2*= 0.29 mm. The *z*-coordinates of the endpoints of the focal region, centered at distance *qF,* are thus *zf1= (qF+)/M2* , *zf2 =(qF-)/M2*. As *M* is almost constant, the virtual field in the expanded focal region is transferred in the real focus with almost uniform *M*-scaling in the transversal coordinates and *M2* -scaling in the axial coordinate. As a consequence, indicating with *Imax* the maximum intensity in the focus QF, the ratios of the intensities at its endpoints*, I(zf1)/Imax* and *I(zf2)/Imax*, reply with good approximation the ratios of the intensities at the virtual endpoints of the expanded focal line at ** and, for the scaling property of Eq.5, at the endpoints of the simulated focal line at 1 THz. To summarize, the axial intensity distribution generated by the axicon at 1 THz frequency can be reproduced with good fidelity by using the visible probe beam at **provided that only a small region around the focus is considered. It is transformed in a region close to the focus of the lens L that is demagnified *M*=22.2 in the cross section and *M2*=492 in the axial direction. The intensity fall at the endpoints *Iax* is*Iax ~0.2% Imax*, so the intensity is almost uniform in the considered width around the focal point. Even if we limited ourselves to examine the intensity variations in a small region around the focus, this is still enough to evaluate the long focusing performances if we compare this result to that one achieved if a conventional focusing optics would be used.

To demonstrate this statement, we replace the axicon with a fictitious convex cylindrical mirror that focuses virtually at the coordinate *zmax* the same Gaussian beam used as input for the axicon (beam waist *w0*= 1 mm) . The focal distance *fTHz* of the mirror is thus *fTHz= zmax* . The beam waist at focus is *w1= fw0* = 0.32 mm. Then, as for the axicon, we change the wavelength** with the simulation wavelength *.* The focused field is calculated with Eq.5 by simply substituting the phase factor corresponding to the axicon (Eq.3) with that one introduced by the fictitious optics, that is *(x)=x2P1/* where *P1 =1/fTHz* is the dioptric power of the mirror. This expression of *(x)* has a form analogous to that one of Eq.3 that describes the phase variation introduced by the axicon, namely a constant multiplied for a function of *x*. Thus, the replication at ** of the field distribution produced at *,* is possible by expanding the *z*-coordinate to *zM*and changing the power of the mirror to *P2=P1/M.* The focal length is enlarged to *f2 = MfTHz = zF* , while the virtual focus waist *w1* is simply translated to *zF .* The lens L provides to transfer this focus in the real space. The well known formulas of Gaussian optics permit to calculate the beam waist of the focused beam and its distance from L, that result *wf=* 0.0148 mm and 104.50 mm respectively. The corresponding Rayleigh range is *zf=wf2/ =* 0.98 mm. The relative intensity fall with respect to the maximum Imax expected at coordinates *±dzq* from *wf* , namely *Icyl/Imax*, can be approximately calculated by the formula *Icyl/Imax ~1-(1+ (dzq/zf )2* )-1 = 9%, to be compared with the observed constant trend of the axial intensity vs. distance.
